# Supplementary material for: Chemical and climatic drivers of radiative forcing due to changes in stratospheric and tropospheric ozone over the 21st century
Source: Copernicus journal article supplement (doi:10.5194/acp-18-2899-2018), 2018-02-28
Supplement: Supplementary file [file acp-18-2899-2018-supplement.pdf]

Supplement of Atmos. Chem. Phys., 18, 2899–2911, 2018  
<https://doi.org/10.5194/acp-18-2899-2018-supplement>  
© Author(s) 2018. This work is distributed under  
the Creative Commons Attribution 4.0 License.

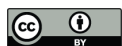

*Supplement of*

## **Chemical and climatic drivers of radiative forcing due to changes in stratospheric and tropospheric ozone over the 21st century**

**Antara Banerjee et al.**

*Correspondence to:* Antara Banerjee (ab4283@columbia.edu)

The copyright of individual parts of the supplement might differ from the CC BY 4.0 License.

|                      | $\Delta[\text{CH}_4]_{\text{ss}}^1$ [ppmv] | RF-CH <sub>4</sub> <sub>ss</sub> <sup>2</sup> [W m <sup>-2</sup> ] | RF-O <sub>3</sub> <sub>ss</sub> <sup>3</sup> [W m <sup>-2</sup> ] |
|----------------------|--------------------------------------------|--------------------------------------------------------------------|-------------------------------------------------------------------|
| $\Delta\text{CC4.5}$ | -0.25                                      | -0.10                                                              | 0.07<br>(-0.02)                                                   |
| $\Delta\text{CC8.5}$ | -0.54                                      | -0.22                                                              | 0.02<br>(-0.05)                                                   |
| $\Delta\text{ODS}$   | 0.09                                       | 0.03                                                               | 0.07<br>(0.01)                                                    |
| $\Delta\text{O3pre}$ | 0.08                                       | 0.03                                                               | -0.09<br>(0.01)                                                   |

**Table S1. Estimates of changes in the global abundance of tropospheric CH<sub>4</sub> ( $\Delta[\text{CH}_4]_{\text{ss}}$ ) from its imposed concentration of 1.75 ppmv to steady state after accounting for adjustments through changes in the CH<sub>4</sub> lifetime. Also reported (to 2 decimal places) are the associated tropospheric RF due to CH<sub>4</sub> (RF-CH<sub>4</sub><sub>ss</sub>) and ozone (RF-O<sub>3</sub><sub>ss</sub>).**

<sup>1</sup> $\Delta[\text{CH}_4]_{\text{ss}}$  [ppmv] has been estimated following the methodology detailed in Banerjee et al. (2014, 2016) (and references therein) using the model-specific feedback factor of 1.52.

<sup>2</sup>RF-CH<sub>4</sub><sub>ss</sub> [Wm<sup>-2</sup>] corresponds to the direct RF of CH<sub>4</sub> that would result from  $\Delta[\text{CH}_4]_{\text{ss}}$  relative to a baseline concentration of 1.75 ppmv, and is calculated using the simple expression in Myhre et al. (1998) (using [N<sub>2</sub>O] = 327 ppbv).

<sup>3</sup>RF-O<sub>3</sub><sub>ss</sub> [Wm<sup>-2</sup>] is the estimate of the tropospheric ozone RF that would result at steady state (bracketed values indicate the difference from Table 2 in the main text where CH<sub>4</sub> feedbacks are neglected). This is obtained by first scaling  $\Delta[\text{CH}_4]_{\text{ss}}$  as in Banerjee et al. (2014, 2016) on a gridbox and monthly mean basis to obtain the corresponding change in ozone abundance. A steady state ozone field ([O<sub>3</sub>]<sub>ss</sub>) is calculated as the sum of this change and the simulated ozone. RF-O<sub>3</sub><sub>ss</sub> is then calculated by applying [O<sub>3</sub>]<sub>ss</sub> as a perturbation within the offline RTM.
